# Supplementary material
Source: PubMed Central journal article supplement (PMC3791767)
Supplement: 1313657110_sapp.pdf [file 1313657110_sapp.pdf]

Supporting Information for

# Distortional Binding of Transition State Analogues to Human PNP probed by MAS Solid State NMR

Mathew J. Vetticatt<sup>a,1</sup>, Boris Itin<sup>b,1</sup>, Gary B. Evans<sup>c</sup>, Vern L. Schramm<sup>a,2</sup>

<sup>a</sup>Department of Biochemistry, Albert Einstein College of Medicine of Yeshiva University, 1300

Morris Park Avenue, Bronx, NY, USA 10461.

<sup>b</sup>New York Structural Biology Center, 89 Convent Ave, New York, NY 10027;

<sup>c</sup> Carbohydrate Chemistry Team, Industrial Research Ltd., Lower Hutt, New Zealand

## **Table of Contents**

|                                                                      |    |
|----------------------------------------------------------------------|----|
| 1. Data from NMR experiments for inter-nuclear distance measurements | 2  |
| (a) Immucillin-H                                                     | 2  |
| (b) DADMe-Immucillin-H                                               | 6  |
| 2. Error analysis .....                                              | 10 |
| 3. Coordinates of calculated fixed distance geometries .....         | 11 |
| Imm-H C-C fixed at 1.47 B3LYP/6-31+G**                               | 11 |
| Imm-H C-C fixed at 1.57 B3LYP/6-31+G**                               | 11 |

# 1. Data from NMR experiments for inter-nuclear distance measurements

S1/S0 is the REDOR dephasing curve

I1Z and I2Z are the signal intensities of the aromatic and aliphatic carbon atoms, respectively, in the R<sup>2</sup> experiment.

Aro = aromatic carbon

Ali = aliphatic carbon

Exp = experimental values

Sim = simulated

## (a) Immucillin-H

|    | time, ms | S0, aro    | S1, aro    | S1/S0, aro | S1/S0,sim |
|----|----------|------------|------------|------------|-----------|
| 0  | 0.087000 | 1.5801e+06 | 1.6116e+06 | 1.0199     | 0.99983   |
| 1  | 0.26300  | 1.5578e+06 | 1.5519e+06 | 0.99621    | 0.99839   |
| 2  | 0.43900  | 1.5300e+06 | 1.4830e+06 | 0.96928    | 0.99554   |
| 3  | 0.61500  | 1.5050e+06 | 1.4681e+06 | 0.97551    | 0.99121   |
| 4  | 0.79100  | 1.4579e+06 | 1.4595e+06 | 1.0011     | 0.98550   |
| 5  | 0.96700  | 1.4216e+06 | 1.3824e+06 | 0.97242    | 0.97834   |
| 6  | 1.1430   | 1.3923e+06 | 1.3480e+06 | 0.96813    | 0.96983   |
| 7  | 1.3190   | 1.3663e+06 | 1.2777e+06 | 0.93511    | 0.95994   |
| 8  | 1.4950   | 1.3164e+06 | 1.2308e+06 | 0.93497    | 0.94874   |
| 9  | 1.6710   | 1.2878e+06 | 1.1722e+06 | 0.91028    | 0.93623   |
| 10 | 1.8470   | 1.2446e+06 | 1.1317e+06 | 0.90933    | 0.92248   |
| 11 | 2.0230   | 1.2055e+06 | 1.0553e+06 | 0.87543    | 0.90750   |
| 12 | 2.1990   | 1.1661e+06 | 1.0393e+06 | 0.89125    | 0.89138   |
| 13 | 2.3750   | 1.1465e+06 | 9.9659e+05 | 0.86926    | 0.87411   |
| 14 | 2.5510   | 1.1102e+06 | 9.2944e+05 | 0.83718    | 0.85581   |
| 15 | 2.7270   | 1.0324e+06 | 8.6589e+05 | 0.83873    | 0.83647   |
| 16 | 2.9030   | 1.0468e+06 | 8.2239e+05 | 0.78562    | 0.81622   |
| 17 | 3.0790   | 9.9910e+05 | 7.9438e+05 | 0.79509    | 0.79504   |
| 18 | 3.2550   | 9.3898e+05 | 7.3303e+05 | 0.78067    | 0.77307   |
| 19 | 3.4310   | 9.1602e+05 | 6.7041e+05 | 0.73187    | 0.75030   |
| 20 | 3.6070   | 8.3220e+05 | 6.3164e+05 | 0.75900    | 0.72688   |
| 21 | 3.7830   | 8.3582e+05 | 5.7284e+05 | 0.68536    | 0.70280   |
| 22 | 3.9590   | 7.9840e+05 | 5.5141e+05 | 0.69064    | 0.67821   |
| 23 | 4.1350   | 7.4808e+05 | 5.1691e+05 | 0.69099    | 0.65310   |

$$\text{fit} = 1.0048 - 0.0122 * x - 0.017891 * x^2$$

|    | time, ms | S0, aro    | S1, aro    | aro S1/S0 | aro, sim |
|----|----------|------------|------------|-----------|----------|
| 0  | 0.087000 | 8.8544e+09 | 9.0392e+09 | 1.0209    | 0.99983  |
| 1  | 0.26100  | 8.8581e+09 | 8.9311e+09 | 1.0082    | 0.99843  |
| 2  | 0.43500  | 8.6840e+09 | 8.7322e+09 | 1.0055    | 0.99562  |
| 3  | 0.60900  | 8.6908e+09 | 8.6811e+09 | 0.99888   | 0.99137  |
| 4  | 0.78300  | 8.5831e+09 | 8.6641e+09 | 1.0094    | 0.98574  |
| 5  | 0.95700  | 8.6213e+09 | 8.4547e+09 | 0.98067   | 0.97869  |
| 6  | 1.1310   | 8.4633e+09 | 8.0623e+09 | 0.95262   | 0.97030  |
| 7  | 1.3050   | 8.2869e+09 | 7.9799e+09 | 0.96295   | 0.96053  |
| 8  | 1.4790   | 8.0267e+09 | 7.7201e+09 | 0.96180   | 0.94949  |
| 9  | 1.6530   | 8.1286e+09 | 7.5573e+09 | 0.92972   | 0.93714  |
| 10 | 1.8270   | 8.0264e+09 | 7.4238e+09 | 0.92492   | 0.92357  |
| 11 | 2.0010   | 7.9641e+09 | 7.1545e+09 | 0.89835   | 0.90878  |
| 12 | 2.1750   | 7.7240e+09 | 7.0264e+09 | 0.90969   | 0.89286  |
| 13 | 2.3490   | 7.5618e+09 | 6.5536e+09 | 0.86667   | 0.87580  |
| 14 | 2.5230   | 7.3939e+09 | 6.2478e+09 | 0.84500   | 0.85771  |
| 15 | 2.6970   | 7.3185e+09 | 5.9902e+09 | 0.81850   | 0.83860  |
| 16 | 2.8710   | 7.0672e+09 | 5.7576e+09 | 0.81470   | 0.81857  |
| 17 | 3.0450   | 6.9180e+09 | 5.3610e+09 | 0.77493   | 0.79763  |
| 18 | 3.2190   | 6.7961e+09 | 5.2532e+09 | 0.77297   | 0.77589  |
| 19 | 3.3930   | 6.8022e+09 | 4.9309e+09 | 0.72490   | 0.75337  |
| 20 | 3.5670   | 6.6398e+09 | 4.6015e+09 | 0.69302   | 0.73018  |
| 21 | 3.7410   | 6.4273e+09 | 4.4580e+09 | 0.69360   | 0.70634  |
| 22 | 3.9150   | 6.2090e+09 | 4.1640e+09 | 0.67063   | 0.68197  |
| 23 | 4.0890   | 6.0672e+09 | 3.9282e+09 | 0.64744   | 0.65709  |
| 24 | 4.2630   | 5.9043e+09 | 3.6665e+09 | 0.62098   | 0.63183  |
| 25 | 4.4370   | 5.7276e+09 | 3.3809e+09 | 0.59029   | 0.60620  |
| 26 | 4.6110   | 5.5832e+09 | 3.2886e+09 | 0.58902   | 0.58032  |
| 27 | 4.7850   | 5.4246e+09 | 3.0581e+09 | 0.56376   | 0.55422  |
| 28 | 4.9590   | 5.1673e+09 | 2.8292e+09 | 0.54753   | 0.52802  |
| 29 | 5.1330   | 4.9536e+09 | 2.6169e+09 | 0.52828   | 0.50174  |
| 30 | 5.3070   | 4.8325e+09 | 2.5340e+09 | 0.52437   | 0.47551  |

$$\text{fit} = 1.01 - 0.0244 * x - 0.014885 * x^2$$

|    | t, ms   | PNP R2, Aro | PNP R2, Ali | PNP Aro-Ali | sim, Aro-Ali |
|----|---------|-------------|-------------|-------------|--------------|
| 0  | 0.0000  | -1.0103e+10 | 1.1472e+10  | 1.0000      | 0.84097      |
| 1  | 0.11500 | -8.5763e+09 | 1.0011e+10  | 0.86151     | 0.80572      |
| 2  | 0.23000 | -5.7922e+09 | 7.9358e+09  | 0.63630     | 0.70672      |
| 3  | 0.34500 | -5.0928e+09 | 5.5384e+09  | 0.49276     | 0.56277      |
| 4  | 0.46000 | -3.4179e+09 | 4.4815e+09  | 0.36614     | 0.40080      |
| 5  | 0.57500 | -1.8182e+09 | 3.0614e+09  | 0.22617     | 0.25023      |
| 6  | 0.69000 | -1.2639e+09 | 2.2135e+09  | 0.16118     | 0.13701      |
| 7  | 0.80500 | -7.0255e+08 | 1.5653e+09  | 0.10511     | 0.078366     |
| 8  | 0.92000 | -9.5096e+08 | 2.1336e+09  | 0.14297     | 0.079692     |
| 9  | 1.0350  | -1.2937e+09 | 2.6526e+09  | 0.18291     | 0.13393      |
| 10 | 1.1500  | -1.7256e+09 | 3.7161e+09  | 0.25222     | 0.22370      |
| 11 | 1.2650  | -2.2177e+09 | 4.3059e+09  | 0.30237     | 0.32552      |
| 12 | 1.3800  | -2.9292e+09 | 4.6049e+09  | 0.34920     | 0.41521      |
| 13 | 1.4950  | -3.1867e+09 | 5.2227e+09  | 0.38977     | 0.47316      |
| 14 | 1.6100  | -3.6767e+09 | 5.8043e+09  | 0.43944     | 0.48838      |
| 15 | 1.7250  | -3.9403e+09 | 5.7498e+09  | 0.44914     | 0.46043      |
| 16 | 1.8400  | -3.8727e+09 | 5.2726e+09  | 0.42389     | 0.39886      |

$$\text{fit} = 0.84 - 0.087 * x - 1.66 * x^2 - 4.52 * x^3 + 12.75 * x^4 - 10.14 * x^5 + 3.32 * x^6 - 0.39 * x^7$$

|    | time, ms | exp, Aro    | exp, Ali   | exp Ali-Aro | sim, ali-aro |
|----|----------|-------------|------------|-------------|--------------|
| 0  | 0.0000   | -1.0586e+10 | 1.4003e+10 | 1.0000      | 0.80638      |
| 1  | 0.10500  | -9.1981e+09 | 1.1413e+10 | 0.83823     | 0.76014      |
| 2  | 0.21000  | -6.5858e+09 | 8.4952e+09 | 0.61332     | 0.63179      |
| 3  | 0.31500  | -3.3842e+09 | 6.0810e+09 | 0.38494     | 0.44987      |
| 4  | 0.42000  | -5.9996e+08 | 3.4101e+09 | 0.16309     | 0.25406      |
| 5  | 0.52500  | -3.4457e+09 | 1.3870e+09 | 0.19654     | 0.085586     |
| 6  | 0.63000  | 5.5129e+08  | 1.0866e+09 | 0.021769    | -0.022683    |
| 7  | 0.73500  | 1.4241e+08  | 1.3878e+09 | 0.050649    | -0.053715    |
| 8  | 0.84000  | -1.7175e+08 | 1.9314e+09 | 0.085533    | -0.0096937   |
| 9  | 0.94500  | -2.4350e+08 | 3.3074e+09 | 0.14441     | 0.089531     |
| 10 | 1.0500   | -9.8703e+08 | 4.7677e+09 | 0.23404     | 0.21235      |
| 11 | 1.1550   | -2.0202e+09 | 5.5433e+09 | 0.30760     | 0.32399      |
| 12 | 1.2600   | -2.8261e+09 | 5.6635e+09 | 0.34526     | 0.39555      |
| 13 | 1.3650   | -3.0618e+09 | 5.6345e+09 | 0.35367     | 0.41099      |
| 14 | 1.4700   | -2.3196e+09 | 5.0565e+09 | 0.29998     | 0.37051      |
| 15 | 1.5750   | -1.5949e+09 | 4.4287e+09 | 0.24497     | 0.28942      |
| 16 | 1.6800   | -5.0960e+08 | 3.2990e+09 | 0.15489     | 0.19310      |
| 17 | 1.7850   | -3.2499e+06 | 1.9969e+09 | 0.081342    | 0.10952      |
| 18 | 1.8900   | -2.1554e+07 | 1.7369e+09 | 0.071515    | 0.061484     |
| 19 | 1.9950   | -1.1359e+08 | 1.7596e+09 | 0.076181    | 0.060641     |
| 20 | 2.1000   | -2.9479e+07 | 2.1683e+09 | 0.089381    | 0.10483      |
| 21 | 2.2050   | -3.1253e+08 | 2.7873e+09 | 0.12607     | 0.17937      |
| 22 | 2.3100   | -9.4477e+08 | 3.5479e+09 | 0.18271     | 0.26177      |
| 23 | 2.4150   | -1.9329e+09 | 4.5102e+09 | 0.26203     | 0.32837      |
| 24 | 2.5200   | -3.0212e+09 | 4.9955e+09 | 0.32603     | 0.36101      |

$$\text{fit} = 0.78436 + 1.44 * x - 14.644 * x^2 + 25.542 * x^3 - 17.127 * x^4 + 4.166 * x^5 + 0.13177 * x^6 - 0.13379 * x^7$$

## (b) DADMe-Immucillin-H

|    | A        | S0 aro     | S1 aro     | S1/S0 aro | sim S1/S0, aro |
|----|----------|------------|------------|-----------|----------------|
| 0  | 0.067000 | 3.8099e+05 | 3.9142e+05 | 1.0274    | 0.99990        |
| 1  | 0.20100  | 3.6635e+05 | 3.9294e+05 | 1.0726    | 0.99903        |
| 2  | 0.33500  | 3.5615e+05 | 3.6448e+05 | 1.0234    | 0.99729        |
| 3  | 0.46900  | 3.3769e+05 | 3.5146e+05 | 1.0408    | 0.99462        |
| 4  | 0.60300  | 3.2735e+05 | 3.5104e+05 | 1.0724    | 0.99109        |
| 5  | 0.73700  | 3.4113e+05 | 3.4517e+05 | 1.0118    | 0.98666        |
| 6  | 0.87100  | 3.4417e+05 | 3.4072e+05 | 0.99000   | 0.98138        |
| 7  | 1.0050   | 3.4540e+05 | 3.5171e+05 | 1.0183    | 0.97521        |
| 8  | 1.1390   | 3.3014e+05 | 3.3280e+05 | 1.0081    | 0.96821        |
| 9  | 1.2730   | 3.1849e+05 | 3.1420e+05 | 0.98651   | 0.96034        |
| 10 | 1.4070   | 3.0330e+05 | 3.0659e+05 | 1.0109    | 0.95168        |
| 11 | 1.5410   | 2.9502e+05 | 2.8387e+05 | 0.96218   | 0.94219        |
| 12 | 1.6750   | 2.8523e+05 | 2.7096e+05 | 0.94997   | 0.93193        |
| 13 | 1.8090   | 2.7459e+05 | 2.5724e+05 | 0.93680   | 0.92088        |
| 14 | 1.9430   | 2.8273e+05 | 2.5921e+05 | 0.91679   | 0.90911        |
| 15 | 2.0770   | 2.8015e+05 | 2.5217e+05 | 0.90011   | 0.89659        |
| 16 | 2.2110   | 2.7102e+05 | 2.4917e+05 | 0.91937   | 0.88338        |
| 17 | 2.3450   | 2.5366e+05 | 2.2846e+05 | 0.90065   | 0.86949        |
| 18 | 2.4790   | 2.4906e+05 | 2.1035e+05 | 0.84456   | 0.85495        |
| 19 | 2.6130   | 2.4179e+05 | 2.1200e+05 | 0.87681   | 0.83978        |
| 20 | 2.7470   | 2.3751e+05 | 1.9257e+05 | 0.81081   | 0.82403        |
| 21 | 2.8810   | 2.2919e+05 | 1.7598e+05 | 0.76782   | 0.80770        |
| 22 | 3.0150   | 2.0815e+05 | 1.6879e+05 | 0.81089   | 0.79085        |
| 23 | 3.1490   | 2.1155e+05 | 1.5978e+05 | 0.75527   | 0.77348        |
| 24 | 3.2830   | 1.9524e+05 | 1.4583e+05 | 0.74694   | 0.75566        |
| 25 | 3.4170   | 1.8786e+05 | 1.3038e+05 | 0.69403   | 0.73738        |
| 26 | 3.5510   | 1.7068e+05 | 1.3087e+05 | 0.76672   | 0.71871        |
| 27 | 3.6850   | 1.7690e+05 | 1.2850e+05 | 0.72637   | 0.69966        |
| 28 | 3.8190   | 1.7034e+05 | 1.0232e+05 | 0.60066   | 0.68028        |

$$\text{fit} = 1.004 - 0.0107 * x - 0.01966 * x^2$$

|    | time, ms | aro, S0    | aro, S1    | aro, S1/S0 | sim, S1/S0 |
|----|----------|------------|------------|------------|------------|
| 0  | 0.067000 | 9.7298e+09 | 9.5899e+09 | 0.98562    | 0.99993    |
| 1  | 0.20100  | 9.5906e+09 | 9.4062e+09 | 0.98077    | 0.99936    |
| 2  | 0.33500  | 9.4228e+09 | 9.4474e+09 | 1.0026     | 0.99821    |
| 3  | 0.46900  | 9.3844e+09 | 9.3258e+09 | 0.99375    | 0.99646    |
| 4  | 0.60300  | 9.4747e+09 | 9.1547e+09 | 0.96623    | 0.99413    |
| 5  | 0.73700  | 9.2054e+09 | 9.1921e+09 | 0.99856    | 0.99120    |
| 6  | 0.87100  | 9.4808e+09 | 9.3408e+09 | 0.98524    | 0.98770    |
| 7  | 1.0050   | 9.4363e+09 | 8.9594e+09 | 0.94946    | 0.98360    |
| 8  | 1.1390   | 9.1337e+09 | 9.4405e+09 | 1.0336     | 0.97895    |
| 9  | 1.2730   | 8.9809e+09 | 8.8392e+09 | 0.98422    | 0.97371    |
| 10 | 1.4070   | 9.0313e+09 | 8.6514e+09 | 0.95794    | 0.96794    |
| 11 | 1.5410   | 8.8089e+09 | 8.6109e+09 | 0.97753    | 0.96158    |
| 12 | 1.6750   | 8.5218e+09 | 8.4827e+09 | 0.99542    | 0.95471    |
| 13 | 1.8090   | 8.5651e+09 | 8.5102e+09 | 0.99359    | 0.94727    |
| 14 | 1.9430   | 8.4234e+09 | 7.7508e+09 | 0.92015    | 0.93933    |
| 15 | 2.0770   | 8.5112e+09 | 8.0354e+09 | 0.94410    | 0.93085    |
| 16 | 2.2110   | 8.3831e+09 | 7.5668e+09 | 0.90263    | 0.92189    |
| 17 | 2.3450   | 8.2066e+09 | 7.5168e+09 | 0.91595    | 0.91241    |
| 18 | 2.4790   | 7.9647e+09 | 7.0978e+09 | 0.89116    | 0.90246    |
| 19 | 2.6130   | 7.8316e+09 | 6.9455e+09 | 0.88685    | 0.89203    |
| 20 | 2.7470   | 7.6908e+09 | 6.7435e+09 | 0.87682    | 0.88116    |
| 21 | 2.8810   | 7.6400e+09 | 6.7629e+09 | 0.88520    | 0.86982    |
| 22 | 3.0150   | 7.6472e+09 | 6.4100e+09 | 0.83822    | 0.85807    |
| 23 | 3.1490   | 7.4580e+09 | 6.4236e+09 | 0.86131    | 0.84589    |
| 24 | 3.2830   | 7.4576e+09 | 5.9813e+09 | 0.80204    | 0.83333    |
| 25 | 3.4170   | 7.4370e+09 | 6.1496e+09 | 0.82689    | 0.82036    |
| 26 | 3.5510   | 7.1242e+09 | 5.6239e+09 | 0.78941    | 0.80705    |
| 27 | 3.6850   | 6.8401e+09 | 5.5234e+09 | 0.80751    | 0.79336    |
| 28 | 3.8190   | 6.7661e+09 | 5.4822e+09 | 0.81024    | 0.77935    |
| 29 | 3.9530   | 6.7527e+09 | 5.0249e+09 | 0.74413    | 0.76501    |
| 30 | 4.0870   | 6.5546e+09 | 4.8993e+09 | 0.74746    | 0.75039    |

$$\text{fit} = 1.0023 - 0.0057686 * x - 0.0138 * x^2$$

|    | time, ms | ali         | aro         | ali-aro, exp | ali-aro, sim |
|----|----------|-------------|-------------|--------------|--------------|
| 0  | 0.0000   | 1.2400e+10  | -1.5525e+10 | 0.99999      | 0.87208      |
| 1  | 0.090900 | 9.7491e+09  | -1.4369e+10 | 0.86365      | 0.83584      |
| 2  | 0.18180  | 6.6981e+09  | -1.2307e+10 | 0.68055      | 0.73420      |
| 3  | 0.27270  | 4.9076e+09  | -5.5597e+09 | 0.37482      | 0.58687      |
| 4  | 0.36360  | 2.1353e+09  | -5.3701e+09 | 0.26876      | 0.42195      |
| 5  | 0.45450  | 1.1071e+09  | -3.8504e+09 | 0.17752      | 0.27001      |
| 6  | 0.54540  | -5.9571e+07 | -4.3318e+09 | 0.15298      | 0.15767      |
| 7  | 0.63630  | 3.0037e+08  | -1.9262e+09 | 0.079730     | 0.10217      |
| 8  | 0.72720  | 1.0337e+09  | -3.6609e+09 | 0.16811      | 0.10822      |
| 9  | 0.81810  | 2.1420e+09  | -3.8301e+09 | 0.21386      | 0.16752      |
| 10 | 0.90900  | 4.0414e+09  | -5.9261e+09 | 0.35693      | 0.26123      |
| 11 | 0.99990  | 5.1198e+09  | -6.6899e+09 | 0.42289      | 0.36464      |
| 12 | 1.0908   | 6.1109e+09  | -8.2207e+09 | 0.51320      | 0.45288      |
| 13 | 1.1817   | 6.7140e+09  | -9.3790e+09 | 0.57627      | 0.50650      |
| 14 | 1.2726   | 6.6888e+09  | -8.5884e+09 | 0.54706      | 0.51547      |
| 15 | 1.3635   | 5.4217e+09  | -9.1799e+09 | 0.52287      | 0.48091      |
| 16 | 1.4544   | 5.3051e+09  | -7.6369e+09 | 0.46344      | 0.41415      |
| 17 | 1.5453   | 3.4233e+09  | -6.6203e+09 | 0.35965      | 0.33349      |
| 18 | 1.6362   | 2.2457e+09  | -6.3897e+09 | 0.30923      | 0.25951      |
| 19 | 1.7271   | 1.0367e+09  | -6.0528e+09 | 0.25387      | 0.21001      |
| 20 | 1.8180   | 7.2981e+08  | -4.2467e+09 | 0.17820      | 0.19594      |
| 21 | 1.9089   | 1.3967e+09  | -5.4442e+09 | 0.24497      | 0.21904      |
| 22 | 1.9998   | 1.2325e+09  | -4.4130e+09 | 0.20216      | 0.27192      |

$$\text{fit} = 0.869 + 0.148 * x - 5.08 * x^2 - 1.956 * x^3 + 23 * x^4 - 26.52 * x^5 + 11.74 * x^6 - 1.842 * x^7$$



|    | time, ms | exp, aro | sim, aro |
|----|----------|----------|----------|
| 0  | 0.0000   | 1.00000  | 0.80703  |
| 1  | 0.095000 | 0.80268  | 0.77244  |
| 2  | 0.19000  | 0.52867  | 0.67593  |
| 3  | 0.28500  | 0.33957  | 0.53763  |
| 4  | 0.38000  | 0.18859  | 0.38589  |
| 5  | 0.47500  | 0.15072  | 0.25080  |
| 6  | 0.57000  | 0.11372  | 0.15747  |
| 7  | 0.66500  | 0.10602  | 0.12054  |
| 8  | 0.76000  | 0.20443  | 0.14140  |
| 9  | 0.85500  | 0.30198  | 0.20850  |
| 10 | 0.95000  | 0.38222  | 0.30069  |
| 11 | 1.0450   | 0.44660  | 0.39279  |
| 12 | 1.1400   | 0.49008  | 0.46173  |
| 13 | 1.2350   | 0.52591  | 0.49196  |
| 14 | 1.3300   | 0.50104  | 0.47878  |
| 15 | 1.4250   | 0.42247  | 0.42878  |
| 16 | 1.5200   | 0.36715  | 0.35753  |
| 17 | 1.6150   | 0.31078  | 0.28508  |
| 18 | 1.7100   | 0.29165  | 0.23061  |
| 19 | 1.8050   | 0.23660  | 0.20756  |
| 20 | 1.9000   | 0.21421  | 0.22044  |
| 21 | 1.9950   | 0.23358  | 0.26410  |
| 22 | 2.0900   | 0.28913  | 0.32553  |
| 23 | 2.1850   | 0.33209  | 0.38763  |
| 24 | 2.2800   | 0.37897  | 0.43389  |
| 25 | 2.3750   | 0.43389  | 0.45271  |
| 26 | 2.4700   | 0.45470  | 0.44029  |
| 27 | 2.5650   | 0.47293  | 0.40133  |
| 28 | 2.6600   | 0.44636  | 0.34746  |

$$\text{fit} = 0.869 + 0.148 * x - 5.08 * x^2 - 1.956 * x^3 + 23 * x^4 - 26.52 * x^5 + 11.74 * x^6 - 1.842 * x^7$$

## 2. Error analysis

| Compound                  | Distance, A | Correlation coefficient<br>(student t fit in<br>Kaleidograph) | Distance variance, A |
|---------------------------|-------------|---------------------------------------------------------------|----------------------|
| <b>ImmH C-C</b>           | 1.47        | 0.95338                                                       | 0.07                 |
| <b>ImmH C-N</b>           | 2.72        | 0.99418                                                       | 0.02                 |
| <b>ImmH-PNP<br/>C-C</b>   | 1.57        | 0.96649                                                       | 0.05                 |
| <b>ImmH-PNP<br/>C-N</b>   | 2.71        | 0.98604                                                       | 0.04                 |
| <b>DADMe-ImmH<br/>C-C</b> | 1.45        | 0.8952                                                        | 0.15                 |
| <b>DADMe-ImmH<br/>C-N</b> | 2.87        | 0.96352                                                       | 0.1                  |
| <b>DADMe-PNP<br/>C-C</b>  | 1.44        | 0.9322                                                        | 0.1                  |
| <b>DADMe-PNP<br/>C-N</b>  | 2.69        | 0.9763                                                        | 0.06                 |

### 3. Coordinates of calculated fixed distance geometries

#### Imm-H C-C fixed at 1.47 B3LYP/6-31+G\*\*

|   |           |           |           |
|---|-----------|-----------|-----------|
| O | 1.444984  | 2.704795  | 1.537080  |
| C | 2.267923  | 2.156107  | 0.516602  |
| C | 2.557662  | 0.725333  | 0.945526  |
| N | 1.236303  | 0.016636  | 1.274009  |
| C | 3.237198  | -0.169578 | -0.102683 |
| O | 4.229531  | -0.912503 | 0.575542  |
| C | 2.116415  | -1.103275 | -0.617970 |
| O | 2.658692  | -2.308234 | -1.111894 |
| C | 1.265627  | -1.375992 | 0.648479  |
| C | -0.097530 | -1.890549 | 0.453718  |
| C | -0.543167 | -3.205546 | 0.509037  |
| N | -1.874487 | -3.242689 | 0.195925  |
| C | -2.318108 | -1.969260 | -0.049226 |
| C | -3.632566 | -1.495404 | -0.389638 |
| O | -4.659487 | -2.132084 | -0.556384 |
| N | -3.595093 | -0.076173 | -0.520059 |
| C | -2.499041 | 0.717096  | -0.337216 |
| N | -1.311358 | 0.268581  | -0.034828 |
| C | -1.235765 | -1.104582 | 0.100010  |
| H | 1.760222  | 2.178143  | -0.459810 |
| H | 3.223960  | 2.685575  | 0.421645  |
| H | 3.155491  | 0.724507  | 1.858625  |
| H | 0.421975  | 0.535956  | 0.875538  |
| H | 3.671919  | 0.425246  | -0.917691 |
| H | 1.506120  | -0.591221 | -1.372230 |
| H | 2.381977  | -2.469075 | -2.022424 |
| H | 1.863331  | -2.016630 | 1.303007  |
| H | 0.001083  | -4.111013 | 0.736740  |
| H | -2.658343 | 1.784515  | -0.456310 |
| H | 1.078170  | -0.019980 | 2.283025  |
| H | 4.533714  | -1.626954 | -0.006873 |
| H | 1.302821  | 3.649497  | 1.391493  |
| H | -2.456199 | -4.069679 | 0.164450  |
| H | -4.484855 | 0.352484  | -0.756053 |

Calculated Atom-atom overlap-weighted NAO bond order = 0.9227

#### Imm-H C-C fixed at 1.57 B3LYP/6-31+G\*\*

|   |          |          |          |
|---|----------|----------|----------|
| O | 1.235289 | 1.042273 | 3.335489 |
|---|----------|----------|----------|

|   |           |           |           |
|---|-----------|-----------|-----------|
| C | 2.224454  | 1.140840  | 2.320133  |
| C | 2.430117  | -0.276193 | 1.806505  |
| N | 1.068287  | -0.885386 | 1.434134  |
| C | 3.287463  | -0.420168 | 0.539880  |
| O | 4.137924  | -1.529376 | 0.745736  |
| C | 2.276930  | -0.713627 | -0.596652 |
| O | 2.902194  | -1.422955 | -1.643473 |
| C | 1.212952  | -1.589037 | 0.096759  |
| C | -0.189007 | -1.685761 | -0.603280 |
| C | -0.656909 | -2.647848 | -1.485645 |
| N | -1.920628 | -2.302186 | -1.885960 |
| C | -2.288433 | -1.133953 | -1.271016 |
| C | -3.516033 | -0.389470 | -1.353435 |
| O | -4.515383 | -0.625343 | -2.011779 |
| N | -3.424195 | 0.753293  | -0.505423 |
| C | -2.356019 | 1.089154  | 0.275830  |
| N | -1.246775 | 0.404360  | 0.334681  |
| C | -1.227622 | -0.722613 | -0.464882 |
| H | 1.898606  | 1.810403  | 1.509445  |
| H | 3.183867  | 1.506867  | 2.706178  |
| H | 2.851800  | -0.899708 | 2.596808  |
| H | 0.333229  | -0.145378 | 1.345471  |
| H | 3.863983  | 0.493052  | 0.338299  |
| H | 1.820797  | 0.218681  | -0.951549 |
| H | 2.768803  | -0.982777 | -2.492003 |
| H | 1.641331  | -2.577933 | 0.272864  |
| H | -0.179710 | -3.543293 | -1.856842 |
| H | -2.467991 | 1.987389  | 0.875425  |
| H | 0.736769  | -1.517139 | 2.165862  |
| H | 4.539897  | -1.773040 | -0.103546 |
| H | 1.127909  | 1.887031  | 3.792311  |
| H | -2.506166 | -2.822994 | -2.525672 |
| H | -4.251875 | 1.341402  | -0.494376 |

Calculated Atom-atom overlap-weighted NAO bond order = 0.8586

Loss of bond order upon 0.1 Å bond stretch = 0.0641

Energy associated with loss of bond order = 0.0641 \* average C-C bond energy = 0.0641\*85 kcal/mol = 5.5 kcal/mol
